## Index to Volume 47

### Articles

|                                                                                                                                                                                                                   |     |
|-------------------------------------------------------------------------------------------------------------------------------------------------------------------------------------------------------------------|-----|
| <b>Alcala, A. C., and Russ, G. R.</b> A direct test of the effects of protective management on abundance and yield of tropical marine resources .....                                                             | 40  |
| <b>Bax, N., and Eliassen, J.-E.</b> Multispecies analysis in Balsfjord, northern Norway: solution and sensitivity analysis of a simple ecosystem model .....                                                      | 175 |
| <b>Beaumont, A. R.</b> Allozyme data and scallop stock identification .....                                                                                                                                       | 333 |
| <b>Coombs, S. H., Nichols, J. H., and Fosh, C. A.</b> Plaice eggs ( <i>Pleuronectes platessa</i> L.) in the southern North Sea: abundance, spawning area, vertical distribution, and buoyancy .....               | 133 |
| <b>Dawson, Wendy A.</b> Otolith measurement as a method of identifying factors affecting first-year growth and stock separation of mackerel ( <i>Scomber scombrus</i> L.) .....                                   | 303 |
| <b>Economou, Alcibiades N.</b> Food and feeding ecology of five gadoid larvae in the northern North Sea .....                                                                                                     | 339 |
| <b>Egidius, Emmy, Hansen, Lars P., Jonsson, Bror, and Nævdal, Gunnar.</b> Mutual impact of wild and cultured Atlantic salmon in Norway .....                                                                      | 404 |
| <b>Ehrich, Siegfried.</b> Comparative fishing experiments by research trawlers for cod and haddock in the North Sea .....                                                                                         | 275 |
| <b>Floc'h, J. Y., Pajot, R., and Wallentinus, I.</b> The Japanese brown alga ( <i>Undaria pinnatifida</i> ) on the coast of France and its possible establishment in European waters .....                        | 379 |
| <b>Grizel, Henri and Héral, Maurice.</b> Introduction into France of the Japanese oyster ( <i>Crassostrea gigas</i> ) .....                                                                                       | 399 |
| <b>Heath, M., and Dunn, J.</b> Avoidance of a midwater frame trawl by herring larvae ..                                                                                                                           | 140 |
| <b>Hopkins, C. C. E., and Nilssen, E. M.</b> Population biology of the deep-water prawn ( <i>Pandalus borealis</i> ) in Balsfjord, northern Norway: I. Abundance, mortality, and growth, 1979–1983 .....          | 148 |
| <b>Horwood, J. W., Jacobs, O. L. R., and Ballance, D. J.</b> A feed-back control law to stabilize fisheries .....                                                                                                 | 57  |
| <b>Horwood, Joseph.</b> An approach to better management: the North Sea haddock ...                                                                                                                               | 318 |
| <b>Houde, E. D.</b> Mini-Symposium on Reproductive Variability: Implications for the Dynamics and Well-Being of Fish Stocks .....                                                                                 | 248 |
| <b>Jones, R., and Shanks, A. M.</b> An estimate of natural mortality for North Sea haddock ..                                                                                                                     | 99  |
| <b>Knudsen, H. P.</b> The Bergen Echo Integrator: an introduction .....                                                                                                                                           | 167 |
| <b>Køie, Marianne.</b> Swimbladder nematodes ( <i>Anguillicola</i> spp.) and gill monogeneans ( <i>Pseudodactylogyrus</i> spp.) parasitic on the European eel ( <i>Anguilla anguilla</i> ) .....                  | 391 |
| <b>Kristiansen, T. S., and Svåsand, T.</b> Enhancement studies of coastal cod in western Norway. Part III. Interrelationships between reared and indigenous cod in a nearly land-locked fjord .....               | 23  |
| <b>Lambert, T. C.</b> The effect of population structure on recruitment in herring .....                                                                                                                          | 249 |
| <b>Mesnil, B., and Shepherd, J. G.</b> A hybrid age- and length-structured model for assessing regulatory measures in multiple-species, multiple-fleet fisheries .....                                            | 115 |
| <b>Misra, R. K., Uthe, J. F., and Vyncke, W.</b> A weighted procedure of analysing for time trends in contaminant levels in CMP data: application to cod and flounder data of the Belgian coast (1978–1985) ..... | 65  |
| <b>Nakashima, B. S.</b> Escapement from a Diamond IX midwater trawl during acoustic surveys for capelin ( <i>Mallotus villosus</i> ) in the Northwest Atlantic .....                                              | 76  |
| <b>Nedreaas, K.</b> Age determination of Northeast Atlantic <i>Sebastes</i> species .....                                                                                                                         | 208 |
| <b>Paul, A. J., Paul, J. M., and Smith, R. L.</b> Rates of oxygen consumption of yellowfin sole ( <i>Limanda aspera</i> (Pallas)) relative to body size, food intake, and temperature .....                       | 205 |
| <b>Pepin, P.</b> Biological correlates of recruitment variability in North Sea fish stocks ...                                                                                                                    | 89  |
| <b>Reddin, D. G., Verspoor, E., and Downton, P. R.</b> An integrated phenotypic and genotypic approach to the stock discrimination of Atlantic salmon .....                                                       | 83  |
| <b>Rijnsdorp, A. D., and Jaworski, A.</b> Size-selective mortality in plaice and cod eggs: a new method in the study of egg mortality .....                                                                       | 256 |

|                                                                                                                                                                                                       |          |
|-------------------------------------------------------------------------------------------------------------------------------------------------------------------------------------------------------|----------|
| <b>Rijnsdorp, A. D., Daan, N., van Beek, F. A., and Heessen, H. J. L.</b> Reproductive variability in North Sea plaice, sole, and cod .....                                                           | 352      |
| <b>Serebryakov, V. P.</b> Population fecundity and reproductive capacity of some food fishes in relation to year-class-strength fluctuations .....                                                    | 267      |
| <b>Shepherd, J. G., and Nicholson, M. D.</b> Multiplicative modelling of catch-at-age data, and its application to catch forecasts .....                                                              | 284      |
| <b>Sindermann, Carl J.</b> Mini-Symposium on Case Histories of Effects of Transfers and Introductions on Marine Resources .....                                                                       | 377      |
| <b>Smith, P. J., Jamieson, A., and Birley, A. J.</b> Electrophoretic studies and the stock concept in marine teleosts .....                                                                           | 231      |
| <b>Sparholt, Henrik, and Vinther, Morten.</b> The biomass of starry ray ( <i>Raja radiata</i> ) in the North Sea .....                                                                                | 295      |
| <b>Svåsand, T., Jørstad, K. E., and Kristiansen, T. S.</b> Enhancement studies of coastal cod in western Norway. Part I. Recruitment of wild and reared cod to a local spawning stock .....           | 5        |
| <b>Svåsand, T., and Kristiansen, T. S.</b> Enhancement studies of coastal cod in western Norway. Part II. Migration of reared coastal cod .....                                                       | 13       |
| <b>Svåsand, T., and Kristiansen, T. S.</b> Enhancement studies of coastal cod in western Norway. Part IV. Mortality of reared cod after release .....                                                 | 30       |
| <b>Toresen, R.</b> Long-term changes in growth of Norwegian spring-spawning herring ...                                                                                                               | 48       |
| <b>van der Wateren, P., Rijnsdorp, A. D., van der Land, M. A., and Fonds, M.</b> Changes in egg size of plaice ( <i>Pleuronectes platessa</i> L.) during incubation, and the effect of fixation ..... | 264      |
| <b>Weston, D. E., and Andrews, H. W.</b> Monthly estimates of fish numbers using a long-range sonar .....                                                                                             | 104      |
| <b>Reviews</b> .....                                                                                                                                                                                  | 246, 376 |
| <b>Obituary</b>                                                                                                                                                                                       |          |
| <b>Beverton, R. J. H.</b> John Alan Gulland (1926–1990) .....                                                                                                                                         | 411      |
| <b>Referees for Volume 47</b> .....                                                                                                                                                                   | 413      |
| <b>Index to Volume 47</b> .....                                                                                                                                                                       | 415      |
